# Supplementary material for: Knowledge, Attitudes, and Willingness of community pharmacists to provide vaccination services: A web-based cross-sectional survey in Uganda
Source: Research Square preprint supplement (doi:10.21203/rs.3.rs-7923040/v1), 2025-11-07
Supplement: Supplementary file 1 [file 1de04ab10f0af8578947bca0.docx]

**Supplementary Table 1:** **Factors associated with good knowledge towards vaccines and vaccination services**

| Variable | Total (%) | Good knowledge | COR (95% CI) | P value | AOR (95% CI) | P Value |
| --- | --- | --- | --- | --- | --- | --- |
| Gender |  |  |  |  |  |  |
| Male | 188 (64.83) | 95 (50.53) | 1.58 (0.97-2.58) | 0.066 | 1.54 (0.91-2.58) | 0.106 |
| Female | 102 (35.17) | 40 (39.21) | Ref | Ref | Ref | Ref |
| Age (Years) |  |  |  |  |  |  |
| 21-30 | 191 (65.86) | 83 (43.45) | Ref | Ref | Ref | Ref |
| 31-40 | 91 (31.38) | 48 (52.75) | 1.45 (0.88-2.40) | 0.144 | 1.61 (0.87-2.96) | 0.128 |
| >40 | 8 (2.76) | 4 (50.00) | 1.30 (0.32-5.36) | 0.715 | 1.78 (0.41-7.68) | 0.440 |
| Location of the pharmacy |  |  |  |  |  |  |
| Rural | 65 (22.41) | 36 (55.38) | Ref | Ref | Ref | Ref |
| Municipality | 60 (20.69) | 23 (38.33) | 0.50 (0.24-1.02) | 0.058 | 0.50 (0.24-1.05) | 0.067 |
| City | 165 (56.90) | 76 (46.06) | 0.69 (0.39-1.22) | 0.204 | 0.70 (0.38-1.26) | 0.234 |
| Education |  |  |  |  |  |  |
| Bachelor | 225 (77.59) | 101 (44.89) | Ref | Ref |  |  |
| Master or higher | 65 (22.41) | 34 (52.31) | 1.35 (0.77-2.34) | 0.292 |  |  |
| Pharmacy type |  |  |  |  |  |  |
| Chain pharmacy | 92 (31.72) | 45 (48.91) | Ref | Ref |  |  |
| Independent owned pharmacy | 198 (68.28) | 90 (45.45) | 0.87 (0.53-1.43) | 0.583 |  |  |
| Job title |  |  |  |  |  |  |
| Community pharmacist | 21 (7.24) | 9 (42.86) | Ref | Ref |  |  |
| Manager | 34 (11.72) | 17 (50.00) | 1.33 (0.45-3.98) | 0.607 |  |  |
| Owner | 42 (14.48) | 19 (45.24) | 1.10 (0.38-3.17) | 0.858 |  |  |
| Staff Pharmacist | 193 (66.55) | 90 (46.63) | 1.16 (0.47-2.89) | 0.742 |  |  |
| Work experience (Years) |  |  |  |  |  |  |
| 1-3 | 205 (70.69) | 87 (42.44) | Ref | Ref | Ref | Ref |
| 4-6 | 58 (20.00) | 35 (60.34) | 2.06 (1.14-3.74) | 0.017 | 1.71 (0.90-3.26) | 0.100 |
| >6 | 27 (9.31) | 13 (48.15) | 1.26 (0.56-2.81) | 0.574 | 0.81 (0.31-2.11) | 0.672 |
| Work hours per week |  |  |  |  |  |  |
| <10 | 165 (56.90) | 68 (41.21) | Ref | Ref | Ref | Ref |
| ≥10 | 125 (43.10) | 67 (53.60) | 1.65 (1.03-2.63) | 0.037 | **1.84 (1.13-3.01)** | **0.015** |
| Access to the internet |  |  |  |  |  |  |
| Always | 231 (79.65) | 108 (46.75) | Ref | Ref |  |  |
| Sometimes | 55 (18.97) | 26 (47.27) | 1.02 (0.57-1.84) | 0.945 |  |  |
| None (Rarely) | 4 (1.38) | 1 (25.00) | 0.38 (0.04-3.70) | 0.405 |  |  |

**Supplementary Table 2: Factors associated with a positive attitude toward offering vaccination services**

| Variable | Total (%) | Positive attitude | COR (95% CI) | P value | AOR (95% CI) | P Value |
| --- | --- | --- | --- | --- | --- | --- |
| Gender |  |  |  |  |  |  |
| Male | 188 (64.83) | 133 (70.74) | 1.99 (1.20-3.28) ** | 0.007 | **1.91 (1.08-3.41) *** | **0.026** |
| Female | 102 (35.17) | 56 (54.90) | Ref | Ref | Ref | Ref |
| Age (Years) |  |  |  |  |  |  |
| 21-30 | 191 (65.86) | 119 (62.30) | Ref | Ref | Ref | Ref |
| 31-40 | 91 (31.38) | 63 (69.23) | 1.36 (0.80-2.32) | 0.256 | **2.34 (1.13-4.84) *** | **0.022** |
| >40 | 8 (2.76) | 7 (87.50) | 4.23 (0.51-35.13) | 0.181 | 5.26 (0.54-51.01) | 0.152 |
| Location of the pharmacy |  |  |  |  |  |  |
| Rural | 65 (22.41) | 40 (61.54) | Ref | Ref |  |  |
| Municipality | 60 (20.69) | 40 (66.67) | 1.25 (0.60-2.60) | 0.551 |  |  |
| City | 165 (56.90) | 109 (66.06) | 1.22 (0.67-2.20) | 0.518 |  |  |
| Education |  |  |  |  |  |  |
| Bachelor | 225 (77.59) | 143 (63.55) | Ref | Ref |  |  |
| Master or higher | 65 (22.41) | 46 (70.77) | 1.38 (0.76-2.53) | 0.283 |  |  |
| Pharmacy type |  |  |  |  |  |  |
| Chain pharmacy | 92 (31.72) | 55 (59.78) | Ref | Ref | Ref | Ref |
| Independent owned pharmacy | 198 (68.28) | 134 (67.68) | 1.41 (0.84-2.35) | 0.190 | 1.59 (0.89-2.82) | 0.110 |
| Job title |  |  |  |  |  |  |
| Pharmacist in-charge | 21 (7.24) | 8 (38.09) | Ref | Ref | Ref | Ref |
| Manager | 34 (11.72) | 26 (76.47) | 5.28 (1.61-17.27) ** | 0.006 | **5.81 (1.52-22.07) *** | **0.010** |
| Owner | 42 (14.48) | 32 (76.19) | 5.20 (1.68-16.12) ** | 0.018 | **4.43 (1.29-15.22) *** | **0.018** |
| Staff Pharmacist | 193 (66.55) | 123 (63.73) | 2.85 (1.13-7.22) | 0.055 | 2.72 (0.98-7.56) | 0.055 |
| Work experience (Years) |  |  |  |  |  |  |
| 1-3 | 205 (70.69) | 135 (65.85) | Ref | Ref | Ref | Ref |
| 4-6 | 58 (20.00) | 42 (72.41) | 1.36 (0.71-2.59) | 0.348 | 0.60 (0.29-1.27) | 0.184 |
| >6 | 27 (9.31) | 12 (44.44) | 0.41 (0.18-0.93) * | 0.034 | **0.13 (0.05-0.39) ***** | **<0.001** |
| Work hours per week |  |  |  |  |  |  |
| <10 | 165 (56.90) | 106 (64.24) | Ref | Ref |  |  |
| ≥10 | 125 (43.10) | 83 (66.40) | 1.10 (0.67-1.79) | 0.703 |  |  |
| Access to the internet |  |  |  |  |  |  |
| Always | 231 (79.65) | 151 (65.37) | Ref | Ref |  |  |
| Sometimes | 55 (18.97) | 34 (61.82) | 0.86 (0.47-1.57) | 0.621 |  |  |
| None (Rarely) | 4 (1.38) | 4 (100.00) | $ (0.0E0-NV) | 0.999 |  |  |
| Knowledge |  |  |  |  |  |  |
| Good | 135 (46.55) | 102 (75.6) | 3.18 (1.72-5.88) | <0.001 | **3.41 (1.74-6.72) ***** | <0.001 |
| Moderate | 86 (29.65) | 53 (61.6) | 1.65 (0.87-3.14) | 0.125 | 1.72 (0.85-3.51) | 0.133 |
| Poor | 69 (23.79) | 34 (49.3) | Ref | Ref | Ref | Ref |

$=855880711.444309, NV=No value

**Supplementary Table 3: Factors associated with willingness to provide vaccination services**

| Variable | Total (%) | Willingness to provide immunization | COR (95% CI) | P value | AOR (95% CI) | P Value |
| --- | --- | --- | --- | --- | --- | --- |
| Gender |  |  |  |  |  |  |
| Male | 188 (64.83) | 170 (90.42) | 1.89 (0.93-3.85) | 0.080 | 0.56 (0.16-1.91) | 0.352 |
| Female | 102 (35.17) | 85 (83.33) | Ref | Ref | Ref | Ref |
| Age (Years) |  |  |  |  |  |  |
| 21-30 | 191 (65.86) | 166 (86.91) | Ref | Ref |  |  |
| 31-40 | 91 (31.38) | 82 (90.11) | 1.37 (0.61-3.07) | 0.442 |  |  |
| >40 | 8 (2.76) | 7 (87.50) | 1.05 (0.12-8.93) | 0.961 |  |  |
| Location of the pharmacy |  |  |  |  |  |  |
| Rural | 65 (22.41) | 61 (93.85) | Ref | Ref | Ref | Ref |
| Municipality | 60 (20.69) | 58 (96.67) | 1.90 (0.33-10.78) | 0.468 | 1.92 (0.21-17.76) | 0.564 |
| City | 165 (56.90) | 136 (82.42) | 0.31 (0.10-0.91) * | 0.034 | **0.14 (0.03-0.74) *** | **0.021** |
| Education |  |  |  |  |  |  |
| Bachelor | 225 (77.59) | 197 (87.55) | Ref | Ref |  |  |
| Master or higher | 65 (22.41) | 58 (89.23) | 1.18 (0.49-2.83) | 0.715 |  |  |
| Pharmacy type |  |  |  |  |  |  |
| Chain pharmacy | 92 (31.72) | 78 (84.78) | Ref | Ref |  |  |
| Independent owned pharmacy | 198 (68.28) | 177 (89.39) | 1.51 (0.73-3.13) | 0.264 |  |  |
| Job title |  |  |  |  |  |  |
| Community pharmacist | 21 (7.24) | 16 (76.19) | Ref | Ref | Ref | Ref |
| Manager | 34 (11.72) | 30 (88.23) | 2.34 (0.55-9.97) | 0.249 | 0.55 (0.03-10.32) | 0.689 |
| Owner | 42 (14.48) | 40 (95.24) | 6.25 (1.10-35.58) | 0.039 | 2.80 (1.67-47.43) | 0.475 |
| Staff Pharmacist | 193 (66.55) | 169 (87.56) | 2.20 (0.74-6.55) | 0.157 | 0.52 (0.04-5.99) | 0.601 |
| Work experience (Years) |  |  |  |  |  |  |
| 1-3 | 205 (70.69) | 184 (89.75) | Ref | Ref | Ref | Ref |
| 4-6 | 58 (20.00) | 50 (86.21) | 0.71 (0.30-1.71) | 0.448 | **0.20 (0.05-0.84) *** | **0.028** |
| >6 | 27 (9.31) | 21 (77.78) | 0.40 (0.14-1.10) | 0.076 | **0.09 (0.02-0.42) **** | **0.003** |
| Work hours per week |  |  |  |  |  |  |
| <10 | 165 (56.90) | 142 (86.06) | Ref | Ref |  |  |
| ≥10 | 125 (43.10) | 113 (90.40) | 1.52 (0.73-3.20) | 0.264 |  |  |
| Access to the internet |  |  |  |  |  |  |
| Always | 231 (79.65) | 198 (85.71) | Ref | Ref | Ref | Ref |
| Sometimes | 55 (18.97) | 53 (96.36) | 4.42 (1.03-19.00) * | 0.046 | 2.78 (0.46-16.86) | 0.265 |
| None (Rarely) | 4 (1.38) | 4 (100.00) | $ (0.0E0-NV) | 0.999 | @ (0.0E0-NV) | 0.999 |
| Knowledge |  |  |  |  |  |  |
| Good | 135 (46.55) | 127 (94.07) | 4.41 (1.77-11.01) ** | 0.001 | **4.69 (1.16-19.00) *** | **0.030** |
| Moderate | 86 (29.65) | 74 (86.05) | 1.71 (0.74-3.95) | 0.207 | 1.04 (0.26-4.09) | 0.954 |
| Poor | 69 (23.79) | 54 (78.26) | Ref | Ref | Ref | Ref |
| Attitude |  |  |  |  |  |  |
| Positive | 189 (65.17) | 185 (97.88) | 150.31 (33.68-670.73) *** | <0.001 | **34.75 (4.02-300.49) **** | **0.001** |
| Neutral | 84 (28.97) | 66 (78.57) | 11.92 (3.46-41.01) *** | <0.001 | **742.86 (58.91-9367.52) ***** | **<0.001** |
| Negative | 17 (5.86) | 4 (23.53) | Ref | Ref | Ref | Ref |

$=269245807.141856, NV=No Value, @=29970978.741939
